# Supplementary material
Source: publisher figshare collection journal article supplement (https://acs.figshare.com/ndownloader/files/4528801)
Supplement: Supplementary file 1 [file 4528801]

  
data_061117c 
  
_audit_creation_method            SHELXL-97 
_chemical_name_systematic 
; 
 ? 
; 
_chemical_name_common             ? 
_chemical_melting_point           ? 
_chemical_formula_moiety          ? 
_chemical_formula_sum 
 'C21 H42.75 Ba2 Dy N3 O32.375' 
_chemical_formula_weight          1292.78 
  
loop_ 
 _atom_type_symbol 
 _atom_type_description 
 _atom_type_scat_dispersion_real 
 _atom_type_scat_dispersion_imag 
 _atom_type_scat_source 
 'C'  'C'   0.0033   0.0016 
 'International Tables Vol C Tables 4.2.6.8 and 6.1.1.4' 
 'H'  'H'   0.0000   0.0000 
 'International Tables Vol C Tables 4.2.6.8 and 6.1.1.4' 
 'N'  'N'   0.0061   0.0033 
 'International Tables Vol C Tables 4.2.6.8 and 6.1.1.4' 
 'O'  'O'   0.0106   0.0060 
 'International Tables Vol C Tables 4.2.6.8 and 6.1.1.4' 
 'Dy'  'Dy'  -0.1892   4.4098 
 'International Tables Vol C Tables 4.2.6.8 and 6.1.1.4' 
 'Ba'  'Ba'  -0.3244   2.2819 
 'International Tables Vol C Tables 4.2.6.8 and 6.1.1.4' 
  
_symmetry_cell_setting            Triclinic 
_symmetry_space_group_name_H-M    P-1 
  
loop_ 
 _symmetry_equiv_pos_as_xyz 
 'x, y, z' 
 '-x, -y, -z' 
  
_cell_length_a                    11.484(2) 
_cell_length_b                    12.500(2) 
_cell_length_c                    15.790(3) 
_cell_angle_alpha                 102.815(3) 
_cell_angle_beta                  105.458(3) 
_cell_angle_gamma                 90.378(3) 
_cell_volume                      2125.0(6) 
_cell_formula_units_Z             2 
_cell_measurement_temperature     294(2) 
_cell_measurement_reflns_used     3102 
_cell_measurement_theta_min       2.40 
_cell_measurement_theta_max       26.24 
  
_exptl_crystal_description        ? 
_exptl_crystal_colour             ? 
_exptl_crystal_size_max           0.12 
_exptl_crystal_size_mid           0.10 
_exptl_crystal_size_min           0.08 
_exptl_crystal_density_meas       NONE 
_exptl_crystal_density_diffrn     2.027 
_exptl_crystal_density_method     'not measured' 
_exptl_crystal_F_000              1256 
_exptl_absorpt_coefficient_mu     3.679 
_exptl_absorpt_correction_type    Multi-scan 
_exptl_absorpt_correction_T_min   0.6666 
_exptl_absorpt_correction_T_max   0.7573 
_exptl_absorpt_process_details    SADABS 
  
_exptl_special_details 
; 
 ? 
; 
  
_diffrn_ambient_temperature       294(2) 
_diffrn_radiation_wavelength      0.71073 
_diffrn_radiation_type            MoK\a 
_diffrn_radiation_source          'fine-focus sealed tube' 
_diffrn_radiation_monochromator   graphite 
_diffrn_measurement_device_type   'CCD area detector' 
_diffrn_measurement_method        'phi and omega scans' 
_diffrn_detector_area_resol_mean  ? 
_diffrn_standards_number          . 
_diffrn_standards_interval_count  . 
_diffrn_standards_interval_time   . 
_diffrn_standards_decay_%         . 
_diffrn_reflns_number             10955 
_diffrn_reflns_av_R_equivalents   0.0360 
_diffrn_reflns_av_sigmaI/netI     0.0750 
_diffrn_reflns_limit_h_min        -13 
_diffrn_reflns_limit_h_max        11 
_diffrn_reflns_limit_k_min        -14 
_diffrn_reflns_limit_k_max        13 
_diffrn_reflns_limit_l_min        -18 
_diffrn_reflns_limit_l_max        18 
_diffrn_reflns_theta_min          1.38 
_diffrn_reflns_theta_max          25.02 
_reflns_number_total              7461 
_reflns_number_gt                 5403 
_reflns_threshold_expression      >2sigma(I) 
  
_computing_data_collection        'Bruker SMART' 
_computing_cell_refinement        'Bruker SMART' 
_computing_data_reduction         'Bruker SAINT' 
_computing_structure_solution     'SHELXS-97 (Sheldrick, 1990)' 
_computing_structure_refinement   'SHELXL-97 (Sheldrick, 1997)' 
_computing_molecular_graphics     'Bruker SHELXTL' 
_computing_publication_material   'Bruker SHELXTL' 
  
_refine_special_details 
; 
 Refinement of F^2^ against ALL reflections.  The weighted R-factor wR and 
 goodness of fit S are based on F^2^, conventional R-factors R are based 
 on F, with F set to zero for negative F^2^. The threshold expression of 
 F^2^ > 2sigma(F^2^) is used only for calculating R-factors(gt) etc. and is 
 not relevant to the choice of reflections for refinement.  R-factors based 
 on F^2^ are statistically about twice as large as those based on F, and R- 
 factors based on ALL data will be even larger. 
; 
  
_refine_ls_structure_factor_coef  Fsqd 
_refine_ls_matrix_type            full 
_refine_ls_weighting_scheme       calc 
_refine_ls_weighting_details 
 'calc w=1/[\s^2^(Fo^2^)+(0.0342P)^2^+15.4166P] where P=(Fo^2^+2Fc^2^)/3' 
_atom_sites_solution_primary      direct 
_atom_sites_solution_secondary    difmap 
_atom_sites_solution_hydrogens    geom 
_refine_ls_hydrogen_treatment     constr 
_refine_ls_extinction_method      none 
_refine_ls_extinction_coef        ? 
_refine_ls_number_reflns          7461 
_refine_ls_number_parameters      579 
_refine_ls_number_restraints      48 
_refine_ls_R_factor_all           0.0758 
_refine_ls_R_factor_gt            0.0471 
_refine_ls_wR_factor_ref          0.1190 
_refine_ls_wR_factor_gt           0.1058 
_refine_ls_goodness_of_fit_ref    1.057 
_refine_ls_restrained_S_all       1.054 
_refine_ls_shift/su_max           0.004 
_refine_ls_shift/su_mean          0.000 
  
loop_ 
 _atom_site_label 
 _atom_site_type_symbol 
 _atom_site_fract_x 
 _atom_site_fract_y 
 _atom_site_fract_z 
 _atom_site_U_iso_or_equiv 
 _atom_site_adp_type 
 _atom_site_occupancy 
 _atom_site_symmetry_multiplicity 
 _atom_site_calc_flag 
 _atom_site_refinement_flags 
 _atom_site_disorder_assembly 
 _atom_site_disorder_group 
Dy1 Dy 0.74408(4) 0.74566(3) 0.74483(3) 0.01870(12) Uani 1 1 d . . . 
Ba1 Ba 0.54741(5) 0.89687(5) 1.08811(4) 0.02590(16) Uani 1 1 d . . . 
Ba2 Ba 1.01002(5) 0.35684(5) 0.55722(4) 0.03234(17) Uani 1 1 d . . . 
C1 C 0.5036(8) 0.6517(7) 0.5672(6) 0.024(2) Uani 1 1 d . . . 
C2 C 0.4290(9) 0.6275(8) 0.4788(6) 0.033(2) Uani 1 1 d . . . 
H2 H 0.3507 0.5963 0.4658 0.040 Uiso 1 1 calc R . . 
C3 C 0.4721(10) 0.6502(9) 0.4112(7) 0.037(3) Uani 1 1 d . . . 
C4 C 0.5900(8) 0.6966(8) 0.4325(6) 0.029(2) Uani 1 1 d . . . 
H4 H 0.6234 0.7096 0.3878 0.035 Uiso 1 1 calc R . . 
C5 C 0.6552(8) 0.7227(7) 0.5224(6) 0.027(2) Uani 1 1 d . . . 
C6 C 0.7832(8) 0.7730(7) 0.5526(7) 0.026(2) Uani 1 1 d . . . 
C7 C 0.4664(9) 0.6294(8) 0.6460(7) 0.029(2) Uani 1 1 d . . . 
C8 C 0.7737(8) 1.0177(7) 0.8210(6) 0.023(2) Uani 1 1 d . . . 
C9 C 0.8180(8) 1.1238(7) 0.8660(6) 0.026(2) Uani 1 1 d . . . 
H9 H 0.7675 1.1816 0.8674 0.031 Uiso 1 1 calc R . . 
C10 C 0.9435(9) 1.1408(7) 0.9098(6) 0.027(2) Uani 1 1 d . . . 
C11 C 1.0125(8) 1.0507(7) 0.9055(6) 0.030(2) Uani 1 1 d . . . 
H11 H 1.0952 1.0592 0.9338 0.036 Uiso 1 1 calc R . . 
C12 C 0.9583(8) 0.9486(7) 0.8595(6) 0.021(2) Uani 1 1 d . . . 
C13 C 1.0253(9) 0.8434(8) 0.8523(6) 0.028(2) Uani 1 1 d . . . 
C14 C 0.6401(8) 0.9909(8) 0.7741(6) 0.024(2) Uani 1 1 d . . . 
C15 C 0.7582(8) 0.6238(7) 0.9144(6) 0.021(2) Uani 1 1 d . . . 
C16 C 0.7743(8) 0.5490(7) 0.9656(6) 0.025(2) Uani 1 1 d . . . 
H16 H 0.7563 0.5642 1.0209 0.030 Uiso 1 1 calc R . . 
C17 C 0.8192(9) 0.4468(7) 0.9338(6) 0.026(2) Uani 1 1 d . . . 
C18 C 0.8433(8) 0.4305(7) 0.8499(6) 0.023(2) Uani 1 1 d . . . 
H18 H 0.8741 0.3653 0.8264 0.027 Uiso 1 1 calc R . . 
C19 C 0.8216(7) 0.5107(7) 0.8027(5) 0.020(2) Uani 1 1 d . . . 
C20 C 0.8424(8) 0.4971(7) 0.7117(6) 0.022(2) Uani 1 1 d . . . 
C21 C 0.7164(8) 0.7360(7) 0.9445(6) 0.023(2) Uani 1 1 d . . . 
N1 N 0.6144(6) 0.6993(6) 0.5881(5) 0.0208(16) Uani 1 1 d . . . 
N2 N 0.8402(6) 0.9314(6) 0.8171(5) 0.0209(17) Uani 1 1 d . . . 
N3 N 0.7809(6) 0.6088(6) 0.8330(4) 0.0194(16) Uani 1 1 d . . . 
O1 O 0.5441(5) 0.6597(5) 0.7219(4) 0.0254(14) Uani 1 1 d . . . 
O2 O 0.3658(6) 0.5822(6) 0.6332(4) 0.0404(18) Uani 1 1 d . . . 
O3 O 0.8311(6) 0.7991(5) 0.6368(4) 0.0299(15) Uani 1 1 d . . . 
O4 O 0.8333(6) 0.7877(5) 0.4954(4) 0.0338(16) Uani 1 1 d . . . 
O5 O 0.6101(5) 0.8922(5) 0.7304(4) 0.0275(15) Uani 1 1 d . . . 
O6 O 0.5690(6) 1.0638(5) 0.7839(4) 0.0318(16) Uani 1 1 d . . . 
O7 O 0.9627(5) 0.7563(5) 0.8099(4) 0.0253(15) Uani 1 1 d . . . 
O8 O 1.1368(6) 0.8521(5) 0.8876(5) 0.0379(18) Uani 1 1 d . . . 
O9 O 0.7064(6) 0.7989(5) 0.8912(4) 0.0232(14) Uani 1 1 d . . . 
O10 O 0.6932(6) 0.7600(5) 1.0185(4) 0.0350(17) Uani 1 1 d . . . 
O11 O 0.8102(6) 0.5758(5) 0.6732(4) 0.0246(14) Uani 1 1 d . . . 
O12 O 0.8869(7) 0.4147(5) 0.6790(4) 0.0378(18) Uani 1 1 d . . . 
O13 O 0.3996(7) 0.6225(8) 0.3263(5) 0.057(2) Uani 1 1 d . . . 
O14 O 0.9958(6) 1.2395(5) 0.9560(5) 0.0400(19) Uani 1 1 d . . . 
H14 H 0.9592 1.2664 0.9929 0.060 Uiso 1 1 calc R . . 
O15 O 0.8350(7) 0.3716(5) 0.9825(5) 0.0369(17) Uani 1 1 d . . . 
H15 H 0.8883 0.3324 0.9708 0.055 Uiso 1 1 calc R . . 
O16 O 1.2091(8) 0.4464(7) 0.6995(6) 0.066(3) Uani 1 1 d . . . 
O17 O 1.0082(11) 0.1890(8) 0.6513(7) 0.058(3) Uani 0.75 1 d P . . 
O18 O 0.8208(15) 0.2014(13) 0.4868(11) 0.092(4) Uani 0.70 1 d PU . . 
O19 O 0.9553(9) 0.3533(8) 0.3707(6) 0.074(3) Uani 1 1 d U . . 
O20 O 0.8383(6) 0.5114(5) 0.5015(4) 0.0322(16) Uani 1 1 d . . . 
O21 O 0.4693(6) 0.8701(5) 0.8877(4) 0.0331(16) Uani 1 1 d . . . 
O22 O 0.6745(5) 1.0104(5) 0.9936(4) 0.0288(15) Uani 1 1 d . . . 
O23 O 0.7546(8) 1.0130(8) 1.2095(6) 0.073(3) Uani 1 1 d . . . 
O24 O 0.6717(8) 0.7774(7) 1.2127(6) 0.064(2) Uani 1 1 d . . . 
O25 O 0.3983(7) 0.7014(6) 1.0159(5) 0.052(2) Uani 1 1 d . . . 
O26 O 0.2640(7) 0.7297(6) 0.7747(6) 0.055(2) Uani 1 1 d . . . 
O27 O 0.4471(8) 0.5934(7) 0.8502(6) 0.062(2) Uani 1 1 d . . . 
O28 O 0.1124(9) 0.3074(8) 0.8225(7) 0.083(3) Uani 1 1 d U . . 
O29 O 0.7313(12) 0.9211(11) 0.3754(9) 0.034(3) Uani 0.50 1 d PU . . 
O30 O 0.4953(9) 0.6264(8) 0.1890(6) 0.071(3) Uani 1 1 d . . . 
O31 O 0.8837(7) 0.4274(7) 0.1637(5) 0.061(2) Uani 1 1 d . . . 
O32 O 0.9715(12) 0.0400(10) 0.3562(9) 0.076(4) Uani 0.75 1 d PU . . 
O33 O 0.7481(17) 0.1734(15) 0.6381(13) 0.073(5) Uani 0.50 1 d P . . 
O34 O 0.6404(13) 0.1323(13) 0.3393(11) 0.056(5) Uani 0.50 1 d P . . 
O35 O 0.595(2) 0.088(2) 0.411(2) 0.043(8) Uani 0.25 1 d P . . 
O36 O 0.603(4) -0.012(4) 0.556(3) 0.023(10) Uani 0.13 1 d PU . . 
O18' O 0.810(3) 0.218(3) 0.432(3) 0.092(4) Uani 0.30 1 d PU . . 
  
loop_ 
 _atom_site_aniso_label 
 _atom_site_aniso_U_11 
 _atom_site_aniso_U_22 
 _atom_site_aniso_U_33 
 _atom_site_aniso_U_23 
 _atom_site_aniso_U_13 
 _atom_site_aniso_U_12 
Dy1 0.0180(2) 0.0185(2) 0.0197(2) 0.00294(17) 0.00659(17) 0.00144(17) 
Ba1 0.0267(3) 0.0245(3) 0.0303(3) 0.0074(3) 0.0132(3) 0.0075(3) 
Ba2 0.0300(3) 0.0416(4) 0.0307(3) 0.0092(3) 0.0164(3) 0.0085(3) 
C1 0.018(5) 0.024(5) 0.031(5) 0.003(4) 0.012(4) 0.000(4) 
C2 0.026(5) 0.039(6) 0.031(6) 0.002(5) 0.007(5) -0.010(5) 
C3 0.038(6) 0.049(7) 0.024(5) 0.005(5) 0.011(5) -0.007(5) 
C4 0.025(5) 0.042(6) 0.018(5) 0.003(4) 0.004(4) -0.003(5) 
C5 0.025(5) 0.021(5) 0.036(6) 0.006(4) 0.010(4) 0.008(4) 
C6 0.024(5) 0.020(5) 0.037(6) 0.011(4) 0.012(5) 0.000(4) 
C7 0.026(5) 0.024(5) 0.036(6) 0.006(5) 0.006(5) -0.001(4) 
C8 0.027(5) 0.018(5) 0.025(5) 0.001(4) 0.012(4) -0.004(4) 
C9 0.030(5) 0.022(5) 0.029(5) 0.007(4) 0.010(4) 0.012(4) 
C10 0.036(6) 0.017(5) 0.027(5) 0.004(4) 0.008(4) -0.003(4) 
C11 0.019(5) 0.025(5) 0.038(6) 0.000(5) 0.001(4) 0.003(4) 
C12 0.025(5) 0.014(4) 0.022(5) 0.000(4) 0.009(4) 0.000(4) 
C13 0.031(6) 0.025(5) 0.028(5) 0.006(4) 0.006(5) 0.002(5) 
C14 0.022(5) 0.036(6) 0.019(5) 0.011(4) 0.008(4) 0.006(5) 
C15 0.022(5) 0.015(4) 0.024(5) 0.000(4) 0.005(4) 0.000(4) 
C16 0.037(6) 0.023(5) 0.016(4) 0.002(4) 0.010(4) 0.002(4) 
C17 0.034(6) 0.019(5) 0.020(5) -0.003(4) 0.005(4) 0.000(4) 
C18 0.024(5) 0.021(5) 0.022(5) -0.001(4) 0.009(4) 0.001(4) 
C19 0.015(4) 0.025(5) 0.014(4) -0.009(4) 0.006(4) -0.003(4) 
C20 0.017(5) 0.024(5) 0.025(5) 0.001(4) 0.009(4) -0.001(4) 
C21 0.017(5) 0.020(5) 0.025(5) -0.004(4) 0.002(4) 0.003(4) 
N1 0.022(4) 0.020(4) 0.021(4) 0.003(3) 0.008(3) -0.005(3) 
N2 0.022(4) 0.019(4) 0.020(4) 0.002(3) 0.005(3) -0.001(3) 
N3 0.018(4) 0.024(4) 0.016(4) -0.005(3) 0.013(3) 0.003(3) 
O1 0.018(3) 0.038(4) 0.018(3) 0.004(3) 0.004(3) -0.007(3) 
O2 0.026(4) 0.064(5) 0.031(4) 0.011(4) 0.009(3) -0.015(4) 
O3 0.025(4) 0.038(4) 0.024(4) 0.005(3) 0.006(3) -0.008(3) 
O4 0.033(4) 0.043(4) 0.030(4) 0.009(3) 0.016(3) -0.001(3) 
O5 0.022(3) 0.021(4) 0.031(4) -0.003(3) 0.000(3) 0.000(3) 
O6 0.027(4) 0.034(4) 0.035(4) 0.008(3) 0.012(3) 0.017(3) 
O7 0.020(3) 0.017(3) 0.033(4) -0.002(3) 0.004(3) 0.002(3) 
O8 0.020(4) 0.023(4) 0.057(5) -0.006(3) -0.002(3) 0.002(3) 
O9 0.035(4) 0.014(3) 0.026(3) 0.009(3) 0.015(3) 0.013(3) 
O10 0.058(5) 0.033(4) 0.021(3) 0.003(3) 0.024(3) 0.022(4) 
O11 0.036(4) 0.019(3) 0.020(3) 0.002(3) 0.012(3) 0.004(3) 
O12 0.057(5) 0.030(4) 0.034(4) 0.003(3) 0.028(4) 0.018(4) 
O13 0.035(4) 0.101(7) 0.023(4) 0.002(4) -0.006(3) -0.024(5) 
O14 0.043(5) 0.016(4) 0.052(5) -0.011(3) 0.013(4) -0.004(3) 
O15 0.054(5) 0.023(4) 0.036(4) 0.009(3) 0.015(4) 0.017(3) 
O16 0.073(6) 0.056(5) 0.051(5) 0.000(4) 0.000(5) -0.003(5) 
O17 0.092(9) 0.039(6) 0.058(7) 0.027(5) 0.032(7) 0.023(6) 
O18 0.092(5) 0.092(5) 0.092(5) 0.0215(13) 0.0252(15) 0.0060(9) 
O19 0.073(3) 0.075(3) 0.073(3) 0.0161(12) 0.0204(12) 0.0061(10) 
O20 0.032(4) 0.034(4) 0.033(4) 0.007(3) 0.013(3) 0.002(3) 
O21 0.030(4) 0.029(4) 0.039(4) 0.002(3) 0.014(3) 0.006(3) 
O22 0.022(3) 0.028(4) 0.034(4) 0.008(3) 0.003(3) 0.006(3) 
O23 0.056(6) 0.089(7) 0.062(6) 0.023(5) -0.009(5) -0.009(5) 
O24 0.064(6) 0.065(6) 0.070(6) 0.036(5) 0.014(5) 0.013(5) 
O25 0.045(5) 0.047(5) 0.059(5) 0.000(4) 0.015(4) -0.013(4) 
O26 0.038(5) 0.048(5) 0.075(6) 0.005(4) 0.016(4) -0.001(4) 
O27 0.054(5) 0.071(6) 0.059(5) 0.003(5) 0.023(4) -0.001(5) 
O28 0.083(3) 0.083(3) 0.083(3) 0.0193(12) 0.0230(13) 0.0053(10) 
O29 0.035(3) 0.034(3) 0.034(3) 0.0085(12) 0.0089(13) 0.0025(10) 
O30 0.081(7) 0.075(6) 0.057(6) 0.020(5) 0.015(5) -0.006(5) 
O31 0.052(5) 0.092(7) 0.034(4) -0.004(4) 0.019(4) 0.013(5) 
O32 0.076(4) 0.076(4) 0.076(4) 0.0175(13) 0.0203(14) 0.0049(11) 
O33 0.081(14) 0.078(13) 0.083(13) 0.042(11) 0.040(11) 0.018(11) 
O34 0.026(8) 0.059(11) 0.057(11) -0.016(9) -0.006(8) 0.001(8) 
O35 0.015(14) 0.036(17) 0.049(18) -0.017(14) -0.016(13) 0.001(12) 
O36 0.024(11) 0.023(11) 0.023(11) 0.005(3) 0.006(3) 0.0015(13) 
O18' 0.092(5) 0.092(5) 0.092(5) 0.0215(13) 0.0253(15) 0.0061(9) 
  
_geom_special_details 
; 
 All esds (except the esd in the dihedral angle between two l.s. planes) 
 are estimated using the full covariance matrix.  The cell esds are taken 
 into account individually in the estimation of esds in distances, angles 
 and torsion angles; correlations between esds in cell parameters are only 
 used when they are defined by crystal symmetry.  An approximate (isotropic) 
 treatment of cell esds is used for estimating esds involving l.s. planes. 
; 
  
loop_ 
 _geom_bond_atom_site_label_1 
 _geom_bond_atom_site_label_2 
 _geom_bond_distance 
 _geom_bond_site_symmetry_2 
 _geom_bond_publ_flag 
Dy1 O3 2.400(6) . ? 
Dy1 O11 2.404(6) . ? 
Dy1 N3 2.407(7) . ? 
Dy1 O5 2.411(6) . ? 
Dy1 O9 2.413(6) . ? 
Dy1 O1 2.432(6) . ? 
Dy1 O7 2.436(6) . ? 
Dy1 N2 2.456(7) . ? 
Dy1 N1 2.463(7) . ? 
Ba1 O6 2.668(7) 2_677 ? 
Ba1 O10 2.669(6) . ? 
Ba1 O23 2.781(8) . ? 
Ba1 O25 2.806(7) . ? 
Ba1 O24 2.824(8) . ? 
Ba1 O21 2.867(6) 2_677 ? 
Ba1 O22 2.906(7) . ? 
Ba1 O22 2.908(6) 2_677 ? 
Ba1 O21 2.990(7) . ? 
Ba1 Ba1 4.1449(12) 2_677 ? 
Ba2 O12 2.657(6) . ? 
Ba2 O4 2.714(7) 2_766 ? 
Ba2 O18 2.726(16) . ? 
Ba2 O16 2.764(8) . ? 
Ba2 O17 2.830(10) . ? 
Ba2 O19 2.833(9) . ? 
Ba2 O20 2.847(7) 2_766 ? 
Ba2 O18' 2.86(4) . ? 
Ba2 O20 2.877(7) . ? 
Ba2 Ba2 4.3344(14) 2_766 ? 
C1 N1 1.327(11) . ? 
C1 C2 1.395(13) . ? 
C1 C7 1.498(13) . ? 
C2 C3 1.370(14) . ? 
C2 H2 0.9300 . ? 
C3 O13 1.343(12) . ? 
C3 C4 1.394(14) . ? 
C4 C5 1.381(13) . ? 
C4 H4 0.9300 . ? 
C5 N1 1.332(12) . ? 
C5 C6 1.504(13) . ? 
C6 O4 1.237(11) . ? 
C6 O3 1.262(11) . ? 
C7 O2 1.240(11) . ? 
C7 O1 1.264(11) . ? 
C8 N2 1.326(11) . ? 
C8 C9 1.379(12) . ? 
C8 C14 1.514(13) . ? 
C9 C10 1.414(13) . ? 
C9 H9 0.9300 . ? 
C10 O14 1.332(10) . ? 
C10 C11 1.381(13) . ? 
C11 C12 1.371(12) . ? 
C11 H11 0.9300 . ? 
C12 N2 1.335(11) . ? 
C12 C13 1.526(12) . ? 
C13 O8 1.246(11) . ? 
C13 O7 1.249(10) . ? 
C14 O6 1.239(11) . ? 
C14 O5 1.267(11) . ? 
C15 C16 1.349(12) . ? 
C15 N3 1.352(11) . ? 
C15 C21 1.503(11) . ? 
C16 C17 1.418(12) . ? 
C16 H16 0.9300 . ? 
C17 O15 1.325(11) . ? 
C17 C18 1.396(12) . ? 
C18 C19 1.364(12) . ? 
C18 H18 0.9300 . ? 
C19 N3 1.349(10) . ? 
C19 C20 1.491(12) . ? 
C20 O12 1.226(10) . ? 
C20 O11 1.275(10) . ? 
C21 O10 1.239(10) . ? 
C21 O9 1.259(11) . ? 
O4 Ba2 2.714(7) 2_766 ? 
O6 Ba1 2.668(7) 2_677 ? 
O14 H14 0.8200 . ? 
O15 H15 0.8200 . ? 
O18 O18' 0.91(4) . ? 
O20 Ba2 2.847(6) 2_766 ? 
O21 Ba1 2.867(6) 2_677 ? 
O22 Ba1 2.908(6) 2_677 ? 
O34 O35 1.56(4) . ? 
  
loop_ 
 _geom_angle_atom_site_label_1 
 _geom_angle_atom_site_label_2 
 _geom_angle_atom_site_label_3 
 _geom_angle 
 _geom_angle_site_symmetry_1 
 _geom_angle_site_symmetry_3 
 _geom_angle_publ_flag 
O3 Dy1 O11 77.1(2) . . ? 
O3 Dy1 N3 135.5(2) . . ? 
O11 Dy1 N3 64.8(2) . . ? 
O3 Dy1 O5 88.4(2) . . ? 
O11 Dy1 O5 147.7(2) . . ? 
N3 Dy1 O5 136.1(2) . . ? 
O3 Dy1 O9 146.6(2) . . ? 
O11 Dy1 O9 129.7(2) . . ? 
N3 Dy1 O9 64.9(2) . . ? 
O5 Dy1 O9 76.2(2) . . ? 
O3 Dy1 O1 129.1(2) . . ? 
O11 Dy1 O1 91.4(2) . . ? 
N3 Dy1 O1 75.9(2) . . ? 
O5 Dy1 O1 75.5(2) . . ? 
O9 Dy1 O1 76.0(2) . . ? 
O3 Dy1 O7 74.1(2) . . ? 
O11 Dy1 O7 74.5(2) . . ? 
N3 Dy1 O7 74.2(2) . . ? 
O5 Dy1 O7 129.3(2) . . ? 
O9 Dy1 O7 92.7(2) . . ? 
O1 Dy1 O7 150.1(2) . . ? 
O3 Dy1 N2 74.3(2) . . ? 
O11 Dy1 N2 134.8(2) . . ? 
N3 Dy1 N2 117.5(2) . . ? 
O5 Dy1 N2 65.1(2) . . ? 
O9 Dy1 N2 72.3(2) . . ? 
O1 Dy1 N2 133.9(2) . . ? 
O7 Dy1 N2 64.4(2) . . ? 
O3 Dy1 N1 65.1(2) . . ? 
O11 Dy1 N1 74.1(2) . . ? 
N3 Dy1 N1 120.7(2) . . ? 
O5 Dy1 N1 73.6(2) . . ? 
O9 Dy1 N1 134.4(2) . . ? 
O1 Dy1 N1 64.0(2) . . ? 
O7 Dy1 N1 132.8(2) . . ? 
N2 Dy1 N1 121.8(2) . . ? 
O6 Ba1 O10 143.6(2) 2_677 . ? 
O6 Ba1 O23 90.4(3) 2_677 . ? 
O10 Ba1 O23 87.5(3) . . ? 
O6 Ba1 O25 86.2(2) 2_677 . ? 
O10 Ba1 O25 78.0(2) . . ? 
O23 Ba1 O25 149.9(3) . . ? 
O6 Ba1 O24 77.0(2) 2_677 . ? 
O10 Ba1 O24 68.7(2) . . ? 
O23 Ba1 O24 67.3(3) . . ? 
O25 Ba1 O24 82.8(3) . . ? 
O6 Ba1 O21 79.60(19) 2_677 2_677 ? 
O10 Ba1 O21 132.1(2) . 2_677 ? 
O23 Ba1 O21 68.3(2) . 2_677 ? 
O25 Ba1 O21 139.7(2) . 2_677 ? 
O24 Ba1 O21 129.0(2) . 2_677 ? 
O6 Ba1 O22 141.29(19) 2_677 . ? 
O10 Ba1 O22 70.95(19) . . ? 
O23 Ba1 O22 70.4(2) . . ? 
O25 Ba1 O22 127.1(2) . . ? 
O24 Ba1 O22 121.4(2) . . ? 
O21 Ba1 O22 62.27(18) 2_677 . ? 
O6 Ba1 O22 75.65(19) 2_677 2_677 ? 
O10 Ba1 O22 132.57(19) . 2_677 ? 
O23 Ba1 O22 126.5(2) . 2_677 ? 
O25 Ba1 O22 81.5(2) . 2_677 ? 
O24 Ba1 O22 149.2(2) . 2_677 ? 
O21 Ba1 O22 58.53(18) 2_677 2_677 ? 
O22 Ba1 O22 89.05(18) . 2_677 ? 
O6 Ba1 O21 133.66(18) 2_677 . ? 
O10 Ba1 O21 72.42(18) . . ? 
O23 Ba1 O21 127.3(2) . . ? 
O25 Ba1 O21 73.2(2) . . ? 
O24 Ba1 O21 137.6(2) . . ? 
O21 Ba1 O21 89.94(17) 2_677 . ? 
O22 Ba1 O21 57.19(17) . . ? 
O22 Ba1 O21 60.79(17) 2_677 . ? 
O6 Ba1 Ba1 111.92(14) 2_677 2_677 ? 
O10 Ba1 Ba1 104.23(14) . 2_677 ? 
O23 Ba1 Ba1 100.4(2) . 2_677 ? 
O25 Ba1 Ba1 108.58(17) . 2_677 ? 
O24 Ba1 Ba1 165.51(18) . 2_677 ? 
O21 Ba1 Ba1 46.17(13) 2_677 2_677 ? 
O22 Ba1 Ba1 44.54(12) . 2_677 ? 
O22 Ba1 Ba1 44.51(13) 2_677 2_677 ? 
O21 Ba1 Ba1 43.76(12) . 2_677 ? 
O12 Ba2 O4 143.6(2) . 2_766 ? 
O12 Ba2 O18 80.3(4) . . ? 
O4 Ba2 O18 91.8(4) 2_766 . ? 
O12 Ba2 O16 84.3(3) . . ? 
O4 Ba2 O16 84.1(2) 2_766 . ? 
O18 Ba2 O16 147.8(4) . . ? 
O12 Ba2 O17 70.0(3) . . ? 
O4 Ba2 O17 74.6(3) 2_766 . ? 
O18 Ba2 O17 63.7(4) . . ? 
O16 Ba2 O17 84.5(3) . . ? 
O12 Ba2 O19 132.6(2) . . ? 
O4 Ba2 O19 78.9(2) 2_766 . ? 
O18 Ba2 O19 78.4(4) . . ? 
O16 Ba2 O19 131.4(3) . . ? 
O17 Ba2 O19 132.4(3) . . ? 
O12 Ba2 O20 129.8(2) . 2_766 ? 
O4 Ba2 O20 77.36(19) 2_766 2_766 ? 
O18 Ba2 O20 139.7(4) . 2_766 ? 
O16 Ba2 O20 70.4(2) . 2_766 ? 
O17 Ba2 O20 144.0(3) . 2_766 ? 
O19 Ba2 O20 61.5(2) . 2_766 ? 
O12 Ba2 O18' 92.4(8) . . ? 
O4 Ba2 O18' 90.4(8) 2_766 . ? 
O18 Ba2 O18' 18.6(8) . . ? 
O16 Ba2 O18' 165.4(8) . . ? 
O17 Ba2 O18' 81.0(9) . . ? 
O19 Ba2 O18' 60.1(9) . . ? 
O20 Ba2 O18' 121.5(8) 2_766 . ? 
O12 Ba2 O20 70.78(19) . . ? 
O4 Ba2 O20 144.62(19) 2_766 . ? 
O18 Ba2 O20 86.2(4) . . ? 
O16 Ba2 O20 115.0(2) . . ? 
O17 Ba2 O20 133.6(3) . . ? 
O19 Ba2 O20 66.0(2) . . ? 
O20 Ba2 O20 81.5(2) 2_766 . ? 
O18' Ba2 O20 76.9(8) . . ? 
O12 Ba2 Ba2 101.65(15) . 2_766 ? 
O4 Ba2 Ba2 113.41(14) 2_766 2_766 ? 
O18 Ba2 Ba2 117.2(4) . 2_766 ? 
O16 Ba2 Ba2 93.47(19) . 2_766 ? 
O17 Ba2 Ba2 171.5(2) . 2_766 ? 
O19 Ba2 Ba2 54.33(19) . 2_766 ? 
O20 Ba2 Ba2 41.03(13) 2_766 2_766 ? 
O18' Ba2 Ba2 101.1(8) . 2_766 ? 
O20 Ba2 Ba2 40.52(13) . 2_766 ? 
N1 C1 C2 121.6(9) . . ? 
N1 C1 C7 114.5(8) . . ? 
C2 C1 C7 123.9(8) . . ? 
C3 C2 C1 119.5(9) . . ? 
C3 C2 H2 120.3 . . ? 
C1 C2 H2 120.3 . . ? 
O13 C3 C2 118.1(9) . . ? 
O13 C3 C4 122.8(9) . . ? 
C2 C3 C4 119.1(9) . . ? 
C5 C4 C3 117.5(9) . . ? 
C5 C4 H4 121.3 . . ? 
C3 C4 H4 121.3 . . ? 
N1 C5 C4 123.5(9) . . ? 
N1 C5 C6 114.6(8) . . ? 
C4 C5 C6 121.8(9) . . ? 
O4 C6 O3 124.6(9) . . ? 
O4 C6 C5 119.4(9) . . ? 
O3 C6 C5 116.0(8) . . ? 
O2 C7 O1 125.0(9) . . ? 
O2 C7 C1 119.4(9) . . ? 
O1 C7 C1 115.5(8) . . ? 
N2 C8 C9 124.5(8) . . ? 
N2 C8 C14 114.5(7) . . ? 
C9 C8 C14 121.0(8) . . ? 
C8 C9 C10 117.1(8) . . ? 
C8 C9 H9 121.4 . . ? 
C10 C9 H9 121.4 . . ? 
O14 C10 C11 119.6(9) . . ? 
O14 C10 C9 122.3(9) . . ? 
C11 C10 C9 118.1(8) . . ? 
C12 C11 C10 119.6(9) . . ? 
C12 C11 H11 120.2 . . ? 
C10 C11 H11 120.2 . . ? 
N2 C12 C11 122.9(8) . . ? 
N2 C12 C13 113.1(7) . . ? 
C11 C12 C13 124.0(8) . . ? 
O8 C13 O7 126.1(9) . . ? 
O8 C13 C12 117.5(8) . . ? 
O7 C13 C12 116.4(8) . . ? 
O6 C14 O5 125.3(9) . . ? 
O6 C14 C8 118.8(8) . . ? 
O5 C14 C8 115.8(8) . . ? 
C16 C15 N3 124.8(8) . . ? 
C16 C15 C21 122.7(8) . . ? 
N3 C15 C21 112.5(8) . . ? 
C15 C16 C17 119.0(8) . . ? 
C15 C16 H16 120.5 . . ? 
C17 C16 H16 120.5 . . ? 
O15 C17 C18 123.0(8) . . ? 
O15 C17 C16 120.1(8) . . ? 
C18 C17 C16 116.8(8) . . ? 
C19 C18 C17 119.6(8) . . ? 
C19 C18 H18 120.2 . . ? 
C17 C18 H18 120.2 . . ? 
N3 C19 C18 124.0(8) . . ? 
N3 C19 C20 113.8(8) . . ? 
C18 C19 C20 122.2(8) . . ? 
O12 C20 O11 124.6(8) . . ? 
O12 C20 C19 120.3(8) . . ? 
O11 C20 C19 115.0(8) . . ? 
O10 C21 O9 124.6(8) . . ? 
O10 C21 C15 118.8(8) . . ? 
O9 C21 C15 116.6(8) . . ? 
C1 N1 C5 118.7(8) . . ? 
C1 N1 Dy1 121.5(6) . . ? 
C5 N1 Dy1 119.8(6) . . ? 
C8 N2 C12 117.6(7) . . ? 
C8 N2 Dy1 120.4(6) . . ? 
C12 N2 Dy1 121.9(6) . . ? 
C19 N3 C15 115.8(7) . . ? 
C19 N3 Dy1 121.9(5) . . ? 
C15 N3 Dy1 122.3(5) . . ? 
C7 O1 Dy1 124.5(6) . . ? 
C6 O3 Dy1 123.7(6) . . ? 
C6 O4 Ba2 120.2(6) . 2_766 ? 
C14 O5 Dy1 123.1(6) . . ? 
C14 O6 Ba1 125.8(6) . 2_677 ? 
C13 O7 Dy1 124.1(6) . . ? 
C21 O9 Dy1 123.5(5) . . ? 
C21 O10 Ba1 134.9(6) . . ? 
C20 O11 Dy1 124.1(5) . . ? 
C20 O12 Ba2 137.7(6) . . ? 
C10 O14 H14 109.5 . . ? 
C17 O15 H15 109.5 . . ? 
O18' O18 Ba2 89(3) . . ? 
Ba2 O20 Ba2 98.5(2) 2_766 . ? 
Ba1 O21 Ba1 90.06(17) 2_677 . ? 
Ba1 O22 Ba1 90.95(17) . 2_677 ? 
O18 O18' Ba2 72(3) . . ? 
  
_diffrn_measured_fraction_theta_max    0.994 
_diffrn_reflns_theta_full              25.02 
_diffrn_measured_fraction_theta_full   0.994 
_refine_diff_density_max    1.655 
_refine_diff_density_min   -0.953 
_refine_diff_density_rms    0.187 
  
  
